# Supplementary material
Source: publisher figshare collection journal article supplement (https://acs.figshare.com/ndownloader/files/3749374)

## *Supporting Information*

### **Competitive adsorption of Cd(II), Cr(VI) and Pb(II) onto nano-maghemite: A spectroscopic and modeling approach**

Michael Komárek <sup>a\*</sup>, Carla M. Koretsky <sup>b</sup>, Krishna J. Stephen <sup>b</sup>,

Daniel S. Alessi <sup>c</sup>, Vladislav Chrastný <sup>a,d</sup>

<sup>a</sup> Department of Environmental Geosciences, Faculty of Environmental Sciences, Czech University of Life Sciences Prague, Kamýcká 129, Prague 6 – Suchbát, 165 21, Czech Republic

<sup>b</sup> Department of Geosciences, Western Michigan University, 1187 Rood Hall, Kalamazoo, MI 49008, USA

<sup>c</sup> Department of Earth and Atmospheric Sciences, University of Alberta, 1-26 Earth Sciences Building, Edmonton, Alberta, T6G 2E3, Canada

<sup>d</sup> Department of Geochemistry, Czech Geological Survey, Geologická 6, 152 00, Prague 5, Czech Republic

---

\* Corresponding author, e-mail: komarek@fzp.czu.cz, tel.: +420224383857, fax: +4202343837

13 pages, 1 Text, 6 Tables, 3 Figures

### *Potentiometric titrations*

Acid-base potentiometric titrations with 1 M HNO<sub>3</sub> and 1 M NaOH were performed in a CO<sub>2</sub>-free chamber with N<sub>2</sub> as the inert gas and 0.01 M NaNO<sub>3</sub> as the background electrolyte. The nano-maghemite suspensions were titrated at 20 and 40 g/L. Hysteresis was observed during the forward and back titration at 20 g/L, but was significantly lower at 40 g/L. The obtained titration curves were also more reproducible at this w/v ratio. Therefore, the latter was used for the modeling. The equilibrium condition was set to a pH drift lower than 0.60 mV/h. Each forward and reverse titration took approximately 2.5 h in total. The laboratory temperature was maintained constant during the experiment.

### *Adsorption modeling*

Data from the kinetic experiments were fitted to pseudo-first-order and pseudo-second-order equations:

$$\ln(q_e - q_t) = \ln q_e - k_1 t \quad (1)$$

$$\frac{t}{q_t} = \frac{1}{k_2 q_e^2} + \frac{1}{q_e} t \quad (2)$$

where  $k_1$  (1/min) is the first-order adsorption rate constant,  $k_2$  (g/μmol/min) is the second-order adsorption rate constant,  $q_e$  (μmol/g) is the adsorbed concentration of metal at equilibrium and  $q_t$  (μmol/g) the adsorbed concentration of metal at time  $t$ .

Langmuir (Eq. 3) and Freundlich (Eq. 4) isotherms were used to describe metal adsorption at equilibrium according to:

$$q_e = \frac{q_{max} K_L c_e}{1 + K_L c_e} \quad (3)$$

$$q_e = K_F c_e^n \quad (4)$$

where  $c_e$  is the equilibrium metal ion concentration in the solution after adsorption ( $\mu\text{mol/L}$ ),  $q_e$  is the adsorbed metal concentration at equilibrium ( $\mu\text{mol/g}$ ),  $q_{max}$  corresponds to the maximum sorption capacity ( $\mu\text{mol/g}$ ),  $K_L$  is the Langmuir constant related to the energy of adsorption,  $K_F$  is a constant indicative of the relative adsorption capacity of the adsorbent and the constant  $n$  indicates the intensity of the adsorption. The model efficiency ( $E$ ), which represents the proportion of regression, calculated from the error sum of squares, relative to the total sum of squares, was used to evaluate the fits. When  $E = 1$ , the data fit the model perfectly.

### *Isotope analyses*

The double-spike method ( $^{111}\text{Cd}$  and  $^{113}\text{Cd}$ ,  $^{50}\text{Cr}$  and  $^{54}\text{Cr}$  enriched isotopes, Isoflex, USA) was applied before sample purification for mass bias correction. An interelement correction method based on adoption of a Tl spike solution (SRM NIST 997) was used to eliminate mass bias during Pb isotope measurement. The analytical sequence consisted of blank solution measurements between each sample and standard. The blank contained 2%  $\text{HNO}_3$  and the measured intensities were subtracted from all samples and standards to obtain a baseline. Samples, standards and blanks were measured in 40 cycles and signals for each cycle were integrated for 4 s. NIST SRMs 3108, 979 and 981 standard solutions were analyzed every three samples. The isotope data for separate metals (Me) were related to this certified reference material as relative deviations in parts per mil (‰) according to:

$$\delta \text{ Me (‰)} = \left[ \frac{\left( \frac{\text{heavier}_{\text{Me}}}{\text{lighter}_{\text{Me}}} \right)_{\text{measured}}}{\left( \frac{\text{heavier}_{\text{Me}}}{\text{lighter}_{\text{Me}}} \right)_{\text{standard}}} - 1 \right] \times 1000 \quad (5)$$

**Table S1** Aqueous species and stability constants used in surface complexation modeling in FITEQL (Visual MINTEQ 3.1 database).

| Reaction                                                                                               | log K |
|--------------------------------------------------------------------------------------------------------|-------|
| $\text{Cd}^{2+} + \text{H}_2\text{O} \rightleftharpoons \text{CdOH}^+ + \text{H}^+$                    | -10.1 |
| $\text{Cd}^{2+} + 2\text{H}_2\text{O} \rightleftharpoons \text{Cd}(\text{OH})_2 + 2\text{H}^+$         | -20.3 |
| $\text{Cd}^{2+} + 3\text{H}_2\text{O} \rightleftharpoons \text{Cd}(\text{OH})_3^- + 3\text{H}^+$       | -33.3 |
| $\text{Cd}^{2+} + 4\text{H}_2\text{O} \rightleftharpoons \text{Cd}(\text{OH})_4^{2-} + 4\text{H}^+$    | -47.3 |
| $2\text{Cd}^{2+} + \text{H}_2\text{O} \rightleftharpoons \text{Cd}_2\text{OH}^{3+} + \text{H}^+$       | -9.39 |
| $\text{Cd}^{2+} + \text{HCO}_3^- \rightleftharpoons \text{CdCO}_3 + \text{H}^+$                        | 4.37  |
| $\text{Cd}^{2+} + 2\text{HCO}_3^- \rightleftharpoons \text{Cd}(\text{CO}_3)_2^{2-} + 2\text{H}^+$      | 7.23  |
| $\text{Cd}^{2+} + \text{HCO}_3^- \rightleftharpoons \text{CdHCO}_3^+$                                  | 11.8  |
| $\text{Cd}^{2+} + \text{NO}_3^- \rightleftharpoons \text{CdNO}_3^+ + \text{H}^+$                       | 0.50  |
| $\text{CrO}_4^{2-} + \text{H}^+ \rightleftharpoons \text{HCrO}_4^-$                                    | 6.51  |
| $\text{CrO}_4^{2-} + 2\text{H}^+ \rightleftharpoons \text{H}_2\text{CrO}_4$                            | 6.31  |
| $2\text{CrO}_4^{2-} + 2\text{H}^+ \rightleftharpoons \text{Cr}_2\text{O}_7^{2-} + \text{H}_2\text{O}$  | 14.6  |
| $\text{CrO}_4^{2-} + \text{Na}^+ \rightleftharpoons \text{NaCrO}_4^-$                                  | 0.70  |
| $\text{CrO}_4^{2-} + \text{K}^+ \rightleftharpoons \text{KCrO}_4^-$                                    | 0.57  |
| $\text{Pb}^{2+} + \text{H}_2\text{O} \rightleftharpoons \text{PbOH}^+ + \text{H}^+$                    | -7.60 |
| $\text{Pb}^{2+} + 2\text{H}_2\text{O} \rightleftharpoons \text{Pb}(\text{OH})_2 + 2\text{H}^+$         | -17.1 |
| $\text{Pb}^{2+} + 3\text{H}_2\text{O} \rightleftharpoons \text{Pb}(\text{OH})_3^- + 3\text{H}^+$       | -28.1 |
| $2\text{Pb}^{2+} + \text{H}_2\text{O} \rightleftharpoons \text{Pb}_2\text{OH}^{3+} + \text{H}^+$       | -6.40 |
| $3\text{Pb}^{2+} + 4\text{H}_2\text{O} \rightleftharpoons \text{Pb}_3(\text{OH})_4^{2+} + 4\text{H}^+$ | -23.9 |
| $4\text{Pb}^{2+} + 4\text{H}_2\text{O} \rightleftharpoons \text{Pb}_4(\text{OH})_4^{4+} + 4\text{H}^+$ | -20.9 |
| $\text{Pb}^{2+} + \text{HCO}_3^- \rightleftharpoons \text{PbCO}_3 + \text{H}^+$                        | -6.53 |
| $\text{Pb}^{2+} + 2\text{HCO}_3^- \rightleftharpoons \text{Pb}(\text{CO}_3)_2^{2-} + 2\text{H}^+$      | 9.94  |
| $\text{Pb}^{2+} + \text{HCO}_3^- \rightleftharpoons \text{PbHCO}_3^+$                                  | 13.2  |
| $\text{Pb}^{2+} + \text{NO}_3^- \rightleftharpoons \text{PbNO}_3^+ + \text{H}^+$                       | 1.17  |
| $\text{H}^+ + \text{OH}^- \rightleftharpoons \text{H}_2\text{O}$                                       | -14.0 |
| $\text{H}^+ + \text{CO}_3^{2-} \rightleftharpoons \text{HCO}_3^-$                                      | 10.3  |
| $2\text{H}^+ + \text{CO}_3^{2-} \rightleftharpoons \text{H}_2\text{CO}_3$                              | 16.7  |
| $\text{Na}^+ + \text{H}^+ + \text{CO}_3^{2-} \rightleftharpoons \text{NaHCO}_3$                        | 10.0  |

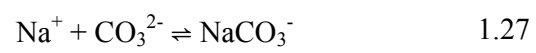

**Table S2** Pseudo-first and pseudo-second order kinetic parameters of metal adsorption onto nano-maghemite at various pH values and in 0.01 M NaNO<sub>3</sub> as background electrolyte;  $k_1$ ,  $k_2$  – kinetic constants,  $q_e$  – adsorbed concentration of metal at equilibrium.

|        |     | Pseudo-first order              |                         |       | Pseudo-second order             |                         |       |
|--------|-----|---------------------------------|-------------------------|-------|---------------------------------|-------------------------|-------|
|        | pH  | $k_1$<br>(g/ $\mu$ mol/<br>min) | $q_e$<br>( $\mu$ mol/g) | $R^2$ | $k_2$<br>(g/ $\mu$ mol/<br>min) | $q_e$<br>( $\mu$ mol/g) | $R^2$ |
| Cd(II) | 6   | n.a.                            | n.a.                    | n.a.  | n.a.                            | n.a.                    | n.a.  |
|        | 7   | 0.049                           | 24.6                    | 0.91  | 0.003                           | 49.4                    | 0.99  |
|        | 8   | 0.049                           | 29.8                    | 0.96  | 0.004                           | 50.5                    | 1.00  |
| Cr(VI) | 3   | 0.070                           | 23.9                    | 0.88  | 0.005                           | 48.4                    | 1.00  |
|        | 4.5 | 0.034                           | 8.99                    | 0.94  | 0.016                           | 36.8                    | 1.00  |
|        | 6   | 0.055                           | 9.93                    | 0.78  | 0.013                           | 34.2                    | 1.00  |
| Pb(II) | 3   | n.a.                            | n.a.                    | n.a.  | n.a.                            | n.a.                    | n.a.  |
|        | 4.5 | 0.035                           | 10.9                    | 0.74  | 0.002                           | 21.6                    | 0.86  |
|        | 6   | 0.045                           | 17.5                    | 0.95  | 0.007                           | 45.8                    | 1.00  |

**Table S3** Isotherm parameters of metal adsorption onto nano-maghemite at various pH values and in 0.01 M NaNO<sub>3</sub> as background electrolyte. The modeled data excluded the precipitation of otavite and hydrocerrusite (Fig. 3);  $K_L$ ,  $K_F$ ,  $n$  – isotherm constants,  $q_{max}$  – maximum sorption capacity,  $E$  – model efficiency.

| Single-metal |     |                |                                                |       |                |       |       |
|--------------|-----|----------------|------------------------------------------------|-------|----------------|-------|-------|
|              | pH  | Langmuir       |                                                |       | Freundlich     |       |       |
|              |     | $K_L$<br>(L/g) | $q_{max}$<br>(mmol/g,<br>μmol/m <sup>2</sup> ) | $E$   | $K_F$<br>(L/g) | $n$   | $E$   |
| Cd(II)       | 3   | n.a.           | n.a.                                           | n.a.  | n.a.           | n.a.  | n.a.  |
|              | 4.5 | n.a.           | n.a.                                           | n.a.  | n.a.           | n.a.  | n.a.  |
|              | 6   | 0.886          | 0.011, 0.247                                   | 0.976 | 0.005          | 0.728 | 0.972 |
|              | 7   | 47.42          | 0.011, 0.247                                   | 0.825 | 0.013          | 0.246 | 0.776 |
|              | 8   | 59.00          | 0.018, 0.404                                   | 0.919 | 0.023          | 0.229 | 0.764 |
| Cr(VI)       | 3   | 74.25          | 0.066, 1.480                                   | 0.971 | 0.076          | 0.211 | 0.956 |
|              | 4.5 | 46.16          | 0.054, 1.211                                   | 0.965 | 0.061          | 0.218 | 0.965 |
|              | 6   | 204.4          | 0.008, 0.179                                   | 0.883 | 0.009          | 0.139 | 0.594 |
| Pb(II)       | 3   | 1.221          | 0.110, 2.466                                   | 0.951 | 0.052          | 0.467 | 0.869 |
|              | 4.5 | 1.925          | 0.135, 3.027                                   | 0.974 | 0.079          | 0.506 | 0.920 |
|              | 6   | 3.129          | 0.216, 4.483                                   | 0.915 | 0.182          | 0.440 | 0.986 |

  

| Multi-metal (Cd(II)+Pb(II)) |     |       |              |       |       |       |       |
|-----------------------------|-----|-------|--------------|-------|-------|-------|-------|
| Cd(II)                      | 6   | n.a.  | n.a.         | n.a.  | n.a.  | n.a.  | n.a.  |
|                             | 7   | 12.59 | 0.011, 0.247 | 0.959 | 0.011 | 0.321 | 0.855 |
|                             | 8   | 41.93 | 0.023, 0.516 | 0.901 | 0.027 | 0.239 | 0.729 |
| Pb(II)                      | 3   | 1.552 | 0.096, 2.152 | 0.908 | 0.050 | 0.426 | 0.807 |
|                             | 4.5 | 3.589 | 0.145, 3.251 | 0.998 | 0.100 | 0.345 | 0.949 |
|                             | 6   | 2.396 | 0.211, 4.731 | 0.943 | 0.165 | 0.544 | 0.982 |

**Table S4** Isotope fractionation of Cd, Cr and Pb after the adsorption at pH values corresponding to maximum sorption according to the data obtained from isotherm modeling (Cd(II) pH 8, Cr(VI) pH 3, Pb(II) pH 6 and in 0.01 M NaNO<sub>3</sub> as background electrolyte, n = 3).

|                                           | Before adsorption  | After adsorption   |
|-------------------------------------------|--------------------|--------------------|
| $\delta^{114}\text{Cd}_{\text{NIST3108}}$ | $-0.088 \pm 0.012$ | $-0.109 \pm 0.008$ |
| $\delta^{53}\text{Cr}_{\text{NIST979}}$   | $0.016 \pm 0.032$  | $-0.053 \pm 0.065$ |
| $\delta^{206}\text{Pb}_{\text{NIST981}}$  | $0.051 \pm 0.022$  | $0.091 \pm 0.036$  |



**Table S5** log K values obtained from individual adsorption edges at various metal concentrations and ionic strengths using FITEQL.

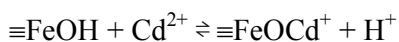

| Metal concentration | Ionic strength | log K  | WSOS/DF |
|---------------------|----------------|--------|---------|
| 10 <sup>-6</sup> M  | 0.001 M        | -1.144 | 0.009   |
| 10 <sup>-6</sup> M  | 0.01 M         | -2.263 | 0.000   |
| 10 <sup>-6</sup> M  | 0.1 M          | -2.385 | 0.001   |
| 10 <sup>-5</sup> M  | 0.001 M        | -2.232 | 0.368   |
| 10 <sup>-5</sup> M  | 0.01 M         | -2.730 | 0.370   |
| 10 <sup>-5</sup> M  | 0.1 M          | -2.926 | 0.936   |

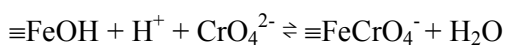

| Metal concentration | Ionic strength | log K  | WSOS/DF |
|---------------------|----------------|--------|---------|
| 10 <sup>-6</sup> M  | 0.001 M        | 10.816 | 0.005   |
| 10 <sup>-6</sup> M  | 0.01 M         | 12.124 | 0.004   |
| 10 <sup>-6</sup> M  | 0.1 M          | 12.069 | 0.008   |
| 10 <sup>-5</sup> M  | 0.001 M        | n.a.   | n.a.    |
| 10 <sup>-5</sup> M  | 0.01 M         | 12.713 | 0.777   |
| 10 <sup>-5</sup> M  | 0.1 M          | 12.588 | 0.084   |

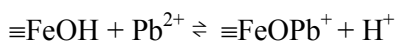

| Metal concentration | Ionic strength | log K | WSOS/DF |
|---------------------|----------------|-------|---------|
| 10 <sup>-6</sup> M  | 0.001 M        | 5.000 | 0.001   |
| 10 <sup>-6</sup> M  | 0.01 M         | 3.445 | 0.006   |
| 10 <sup>-6</sup> M  | 0.1 M          | 3.569 | 0.005   |
| 10 <sup>-5</sup> M  | 0.001 M        | 4.074 | 0.291   |
| 10 <sup>-5</sup> M  | 0.01 M         | 2.385 | 0.256   |
| 10 <sup>-5</sup> M  | 0.1 M          | 1.471 | 0.051   |

**Table S6** Beam-induced reduction of Cr(VI) to Cr(III) on Cr-sorbed nano-maghemite in the synchrotron X-ray beamline. The % Cr(VI) and % Cr(III) were calculated by linear combination fitting (LCF) of a time series of 9 sample scans (see Figure S2a) using Cr(VI) and Cr(III) standards. These data were used to fit a first-order kinetics model (Fig. S3) to determine that all Cr initially sorbed to the nano-maghemite was hexavalent.

| XAS Scan # | Time elapsed (min) | % Cr(VI) - LCF | % Cr(III) - LCF | % Cr(VI) - rate equation fit |
|------------|--------------------|----------------|-----------------|------------------------------|
| 0          | 0                  |                |                 | 100                          |
| 1          | 48.9               | 86.3           | 13.7            | 85.9                         |
| 2          | 97.7               | 72.4           | 27.6            | 73.9                         |
| 3          | 146.6              | 62.1           | 37.9            | 63.5                         |
| 4          | 195.5              | 54.6           | 45.4            | 54.6                         |
| 5          | 244.3              | 47.9           | 52.1            | 46.9                         |
| 6          | 293.2              | 40.8           | 59.2            | 40.3                         |
| 7          | 342.1              | 34.9           | 65.1            | 34.6                         |
| 8          | 390.9              | 31.0           | 69.0            | 29.8                         |
| 9          | 439.8              | 27.0           | 73.0            | 25.6                         |

  

| Rate const (min <sup>-1</sup> ) | t (1/2) (min) |
|---------------------------------|---------------|
| 0.0031                          | 223.6         |

**Figure S1** XPS spectra of Fe(III) and Cd(II), Cr(VI) and Pb(II) adsorbed onto nano-maghemite at pH values corresponding to maximum sorption (Cd(II) pH 8, Cr(VI) pH 3, Pb(II) pH 6 and 0.01 M NaNO<sub>3</sub> as background electrolyte).

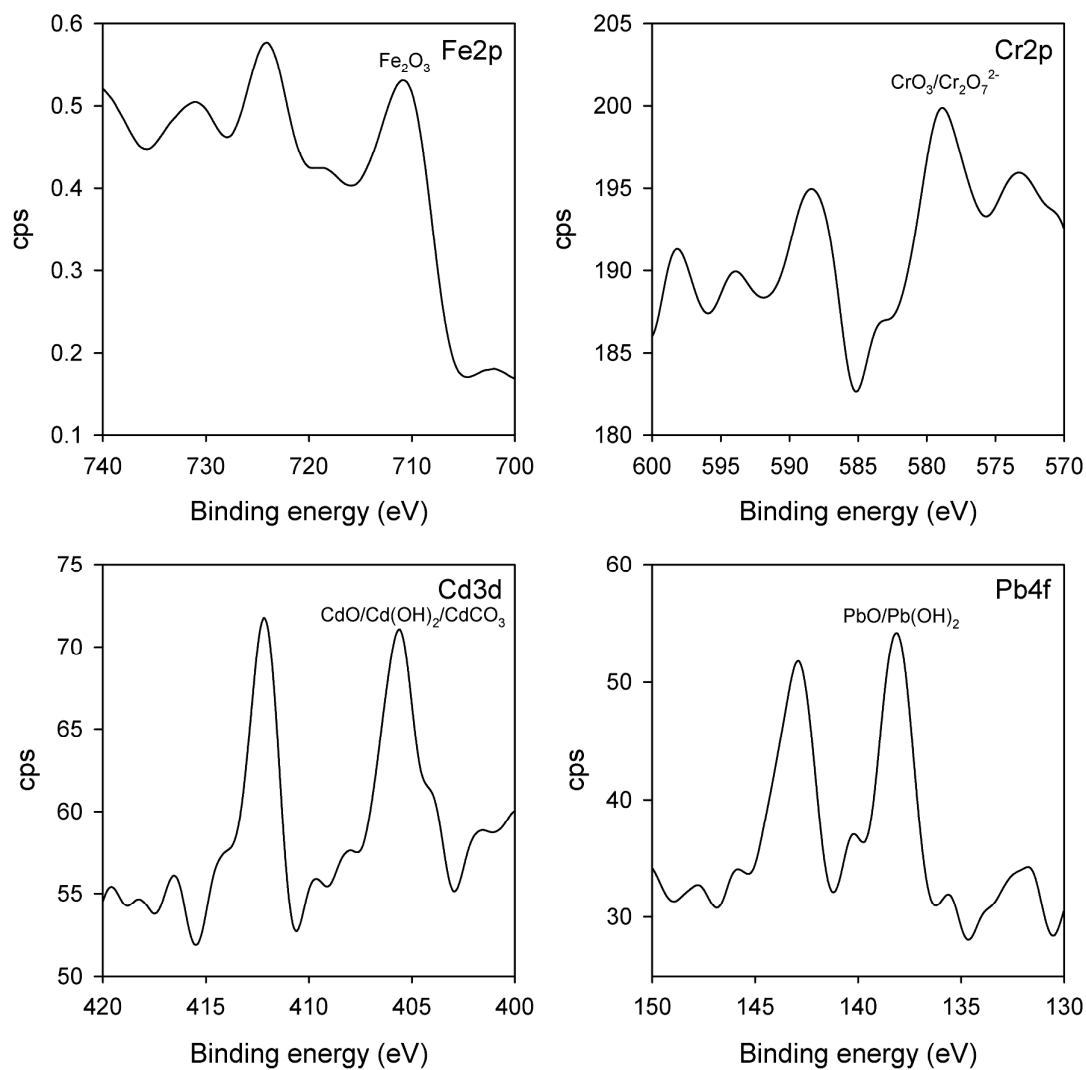

**Figure S2** (a) Cr K-edge XANES of Cr-sorbed nano-maghemite, showing 9 sequential scans. The initial scan (brown spectrum) indicates 86.3% of the total Cr is hexavalent (see also Table S3) after 48.9 minutes of analysis (one scan time). Progressive scans show further Cr(VI) oxidation, as indicated by spectral changes such as a shrinking of the feature (peak) at 5994 eV that is indicative of Cr(VI). 73% of the total Cr is reduced to Cr(III) after 9 scans (yellow spectrum); (b) Fe K-edge XANES analyses on nano-maghemite with and without adsorbed Cr(VI); (c) linear combination fitting of 9 Cr K-edge scans, showing progressive reduction of Cr(VI) to Cr(III). Black dashed lines indicate fit, and results of fit appear in Table S3. Experiments prepared by adsorbing Cr(VI) onto nano-maghemite at pH 3 corresponding to maximum sorption and using 0.01 M NaNO<sub>3</sub> as background electrolyte.

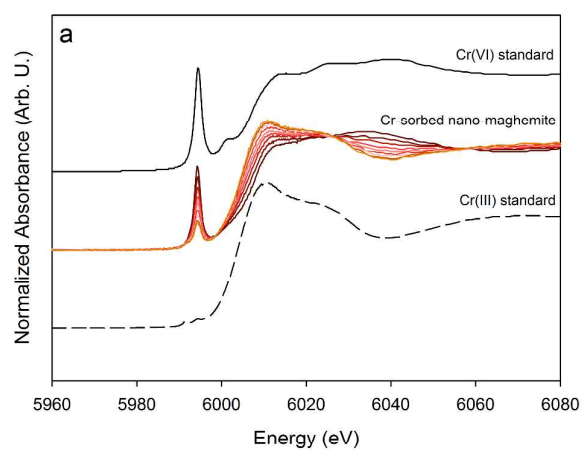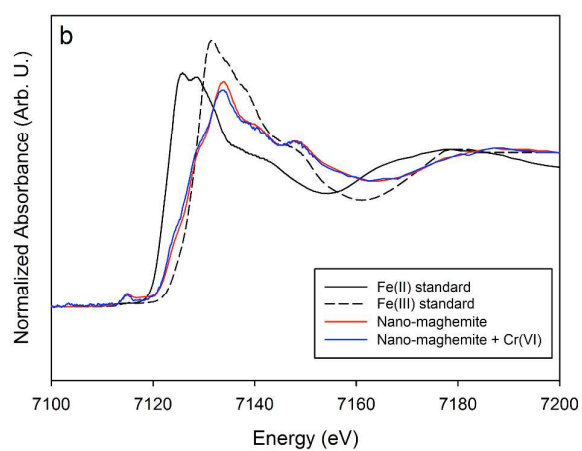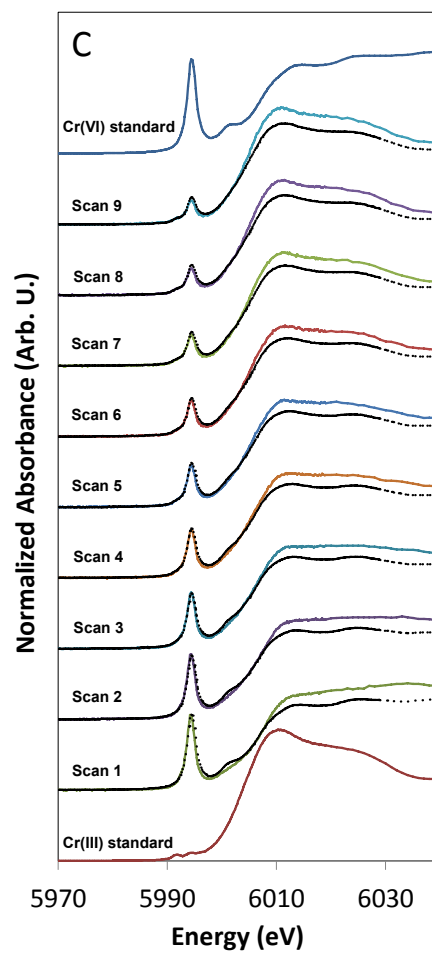

**Figure S3** First-order kinetics model of the reduction of Cr(VI) on nano-maghemite, induced by the synchrotron X-ray beam. Each scan at the beamline was 48.9 min, and a total of 9 scans were collected. The first order rate constant is  $0.0031 \text{ min}^{-1}$ , yielding a half life of Cr(VI) reduction to Cr(III) of approximately 224 min. Extrapolating the rate equation to  $t = 0$  indicates that all of the Cr adsorbed to the NM prior to XAS analysis was hexavalent. See Table S6 for data.

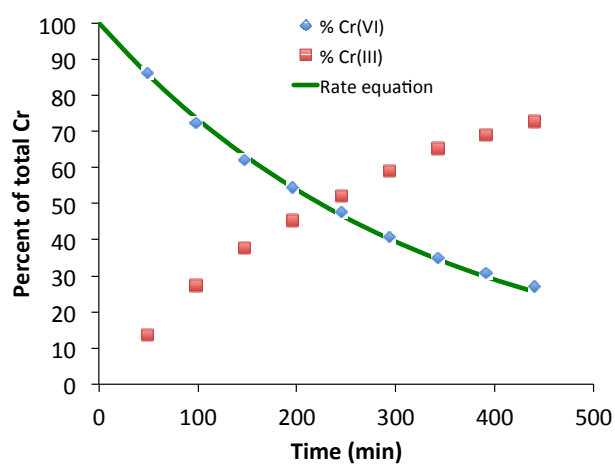

Supplement: Supplementary file 1 [file 3749374]
